# Supplementary material
Source: publisher figshare collection journal article supplement (https://acs.figshare.com/ndownloader/files/27796341)
Supplement: Supplementary file 1 [file 27796341]

## Supporting Information

# Solid Electrolyte Interphase Layer Formation during Lithiation of Single Crystal Silicon Electrodes with a Protective Aluminum Oxide Coating

Arne Ronneburg<sup>1</sup>, Luca Silvi<sup>1</sup>, Joshaniel Cooper<sup>2</sup>, Karsten Harbauer<sup>3</sup>, Matthias Ballauff<sup>1,4</sup>, Sebastian Risse<sup>1\*</sup>

**1:** Helmholtz-Zentrum Berlin, Department for Electrochemical Energy Storage, Hahn-Meitner Platz 1, 14109, Berlin, Germany; **2:** ISIS, Harwell Science and Innovation Campus, STFC, Oxon OX11 0QH, United Kingdom; **3:** Helmholtz-Zentrum Berlin, Institute for Solar Fuels, Hahn-Meitner Platz 1, 14109, Berlin, Germany; **4:** Freie Universität Berlin, Institute for Chemistry and Biochemistry, Takustraße 3, 14195 Berlin, Germany

\*corresponding author: sebastian.risse@helmholtz-berlin.de

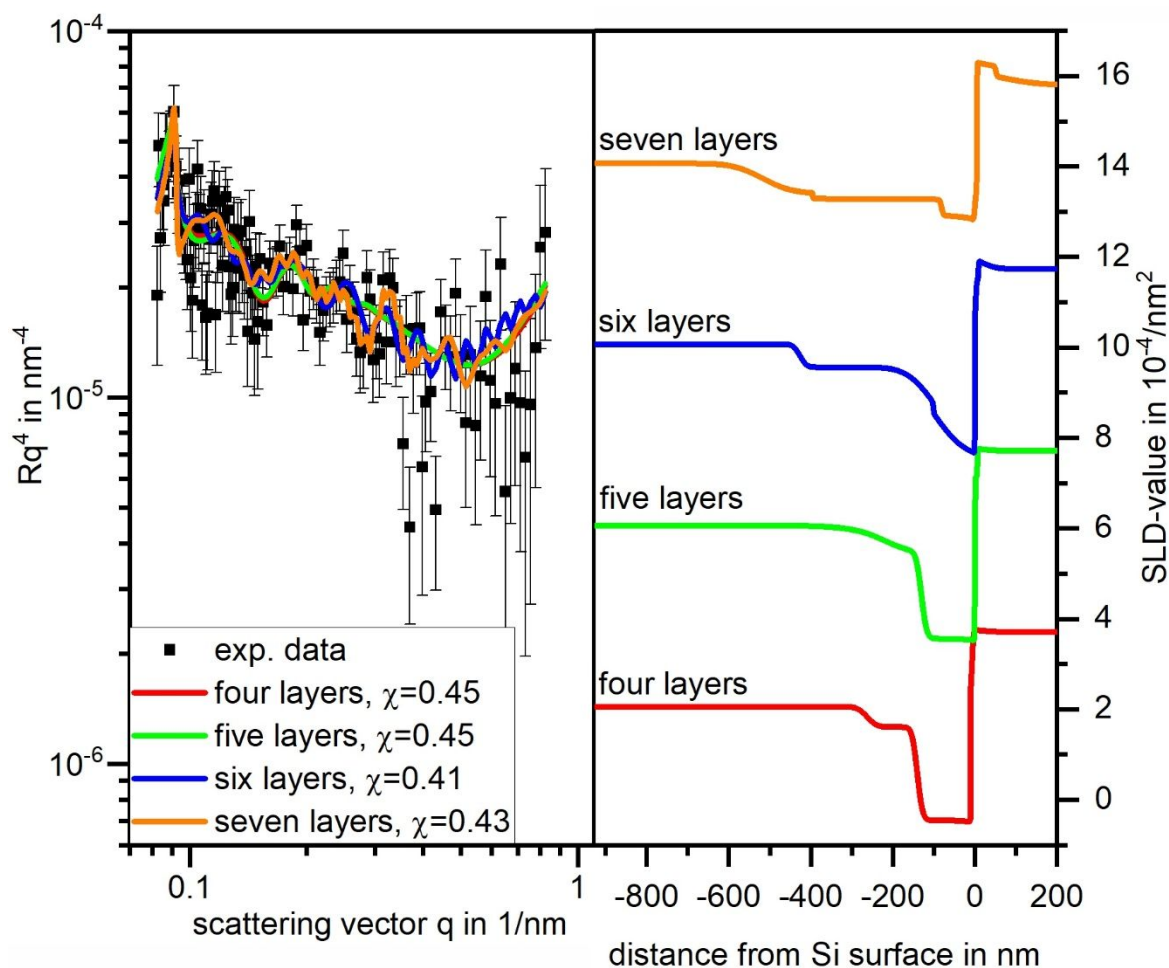

Figure S1: Optimization of the SLD-model. Four different layer-numbers were tested against an intermediate lithiated state. A 6-layer model showed the lowest residuum and was therefore chosen to analyze the data.

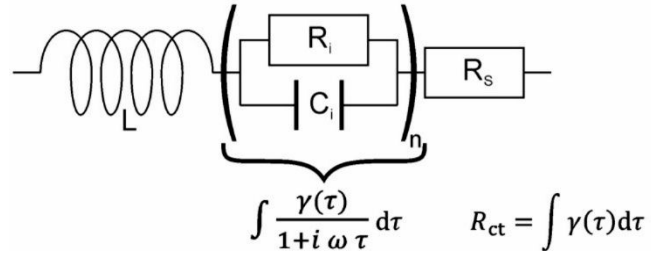

Figure S2: Equivalent circuit used for the analysis of the EIS-measurement. The distribution of relaxation times  $\gamma(\tau)$  is split into a fast ( $\tau < 1.5$  s) and a slow ( $\tau > 1.5$  s) part.

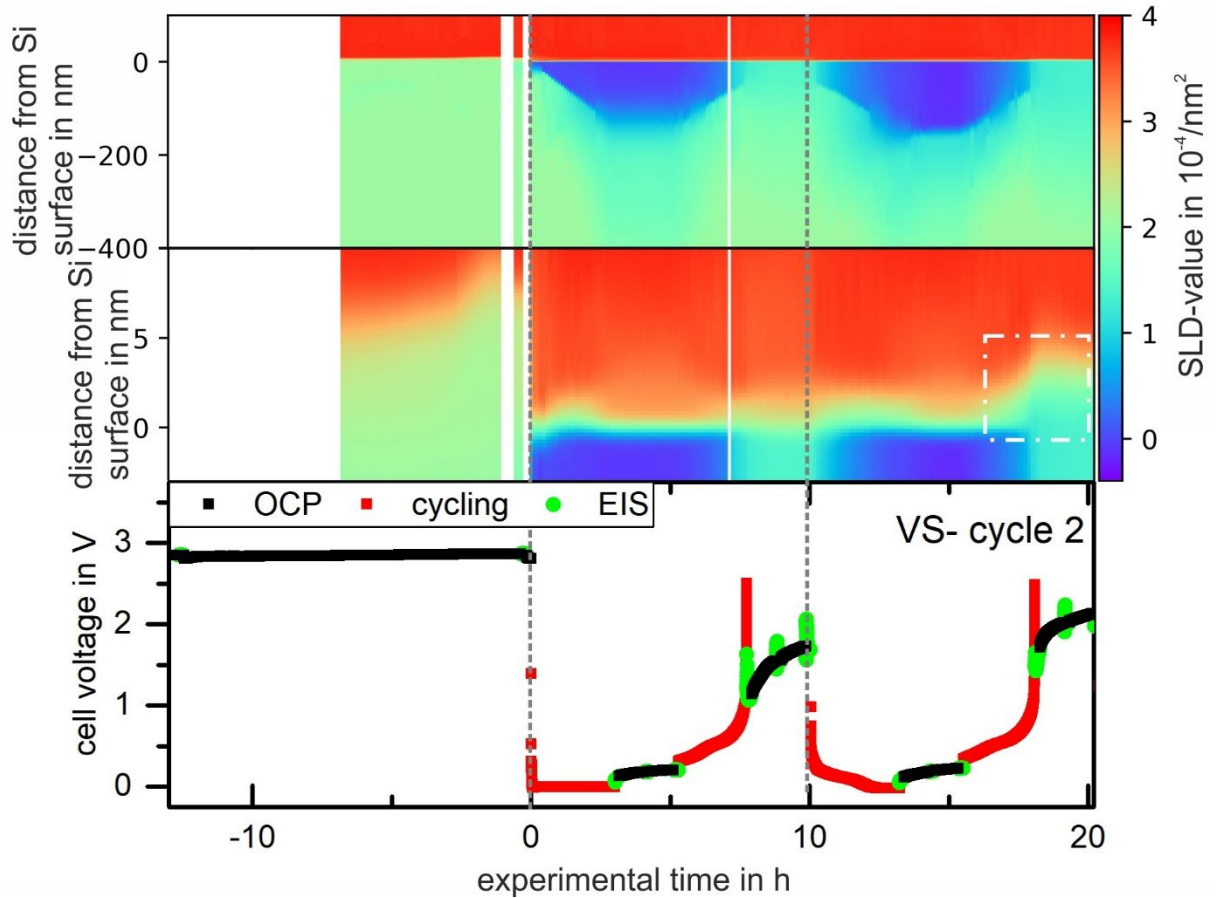

Figure S3: SLD-pattern of the virgin state up to the second cycle. On top the SLD-map of the whole depth is shown, in the middle a zoom-in to the surface. The voltage is shown at the bottom. Dashed lines indicate the beginning of a cycle. The white rectangle indicates the decomposition of the artificial SEI-layer.

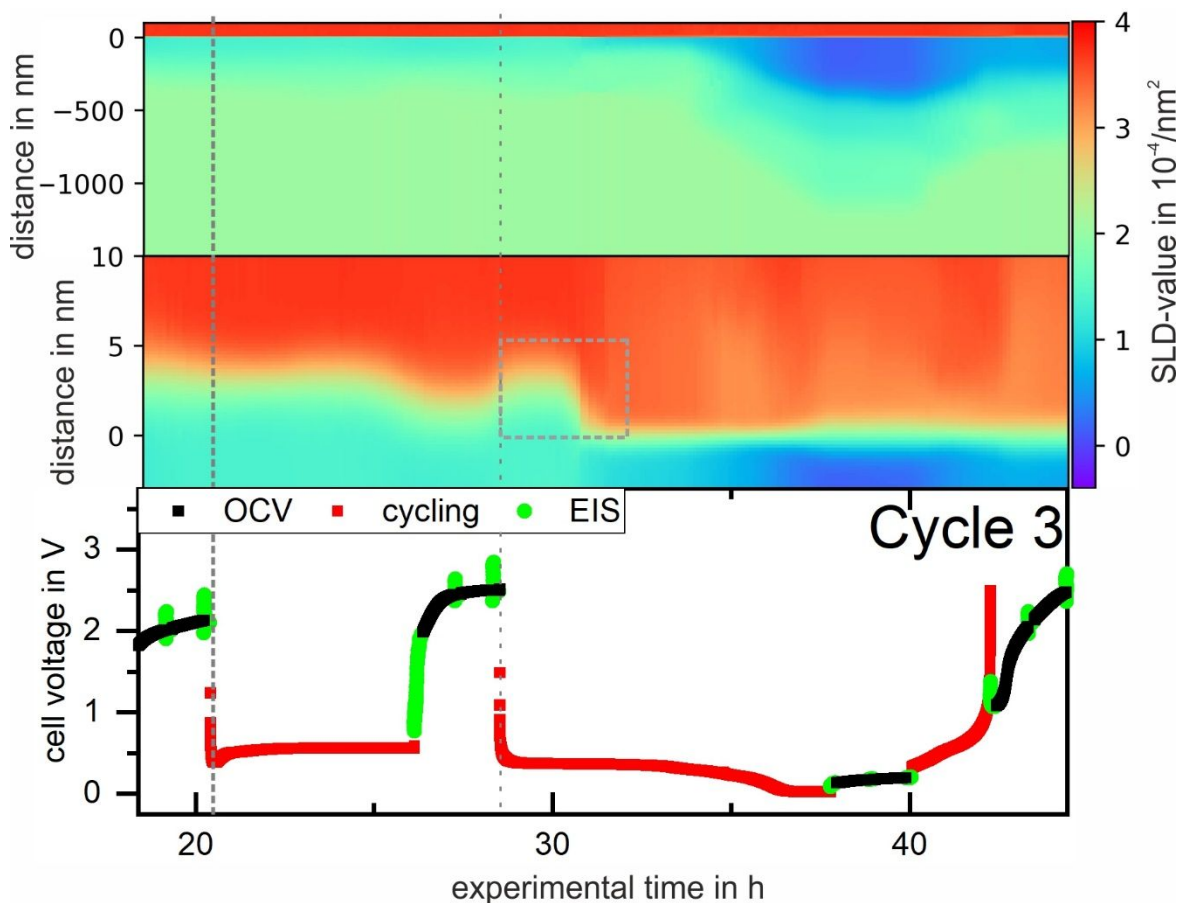

Figure S4: SLD-pattern of the third cycle. On top the SLD-map of the whole depth is shown, in the middle a zoom-in to the surface. The voltage is shown at the bottom. Dashed lines indicate the beginning of a cycle. The grey rectangle indicates the decomposition SEI-layer, which delays the lithiation process.

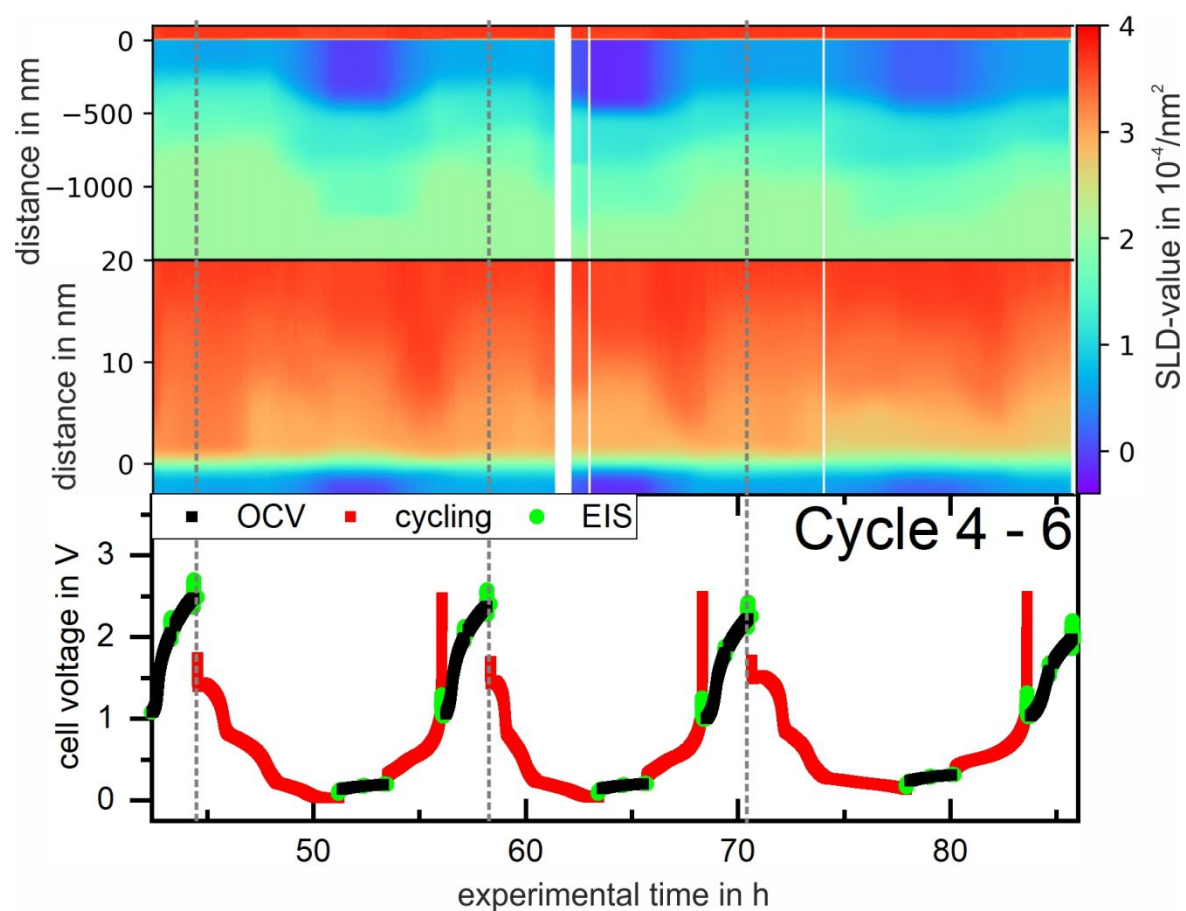

Figure S5: SLD-pattern of the fourth to sixth cycle. On top the SLD-map of the whole depth is shown, in the middle a zoom-in to the surface. The voltage is shown at the bottom. Dashed lines indicate the beginning of a cycle.

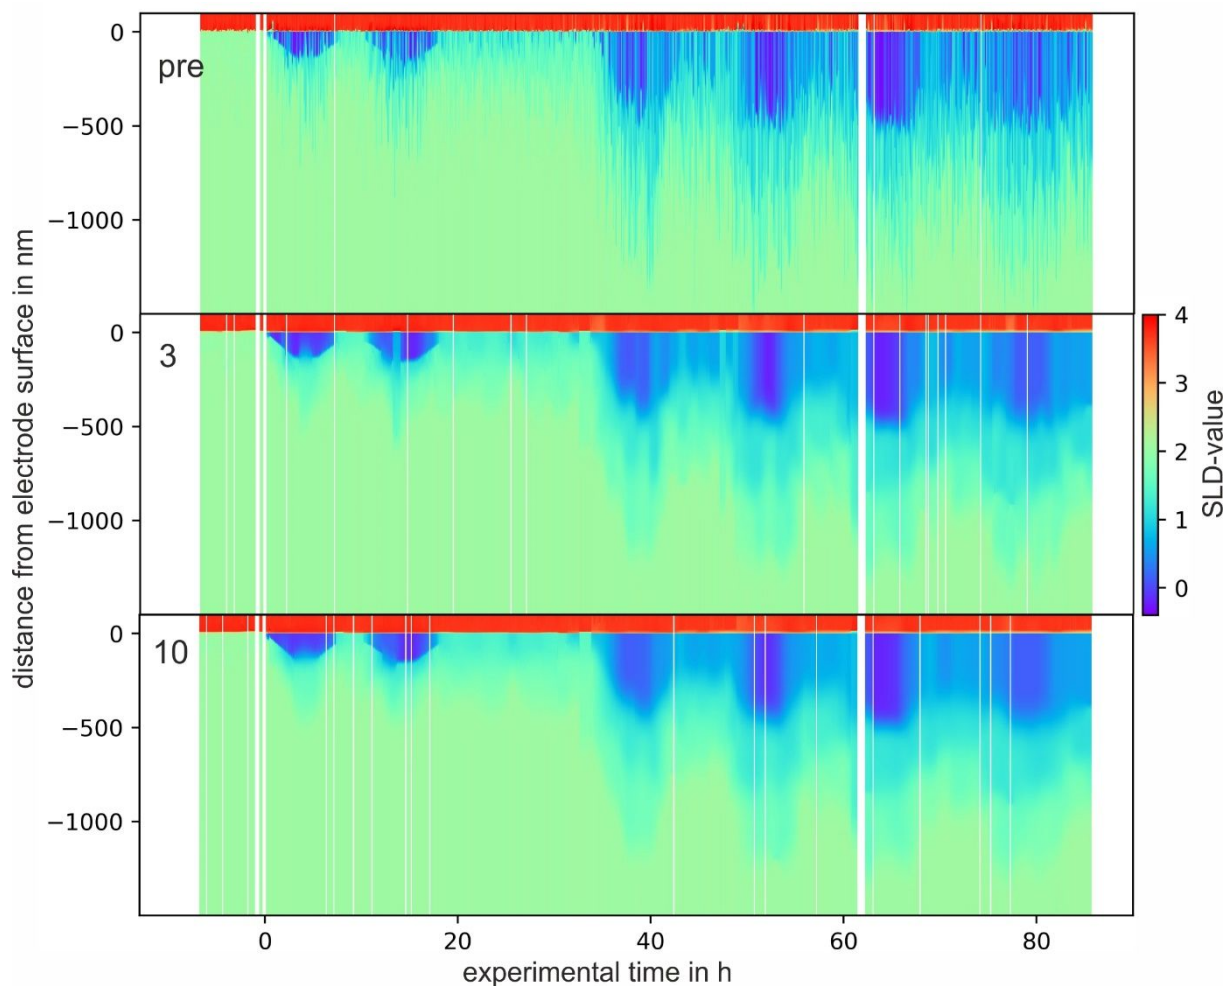

Figure S6: Evolution of the SLD-map during fit-rounds. On top, the SLD-map after the initial fitting is shown without taking neighboring profiles into account. The observed differences between the profiles are not meaningful since they result from a continuous data-acquisition (*operando*-measurement). Therefore the neighboring profiles were taken into account. The resulting SLD-map after 3 and 10 cycles is shown in the middle and at the bottom, respectively. The reflectivity- and charge-residuum do not increase significantly. The white stripes denote the absence of reflectivity data due to beam off periods.



| PWREISPOt-start_zhit.txt |                           |
|--------------------------|---------------------------|
| Exp. Time / h            | -12.68                    |
| Rs / $\Omega$            | 1.67541                   |
| L / H                    | $7.02216 \times 10^{-11}$ |
| RelError / %             | 0.522765                  |
| iterations               | 30000                     |
| Calc. Time [s]           | 0.9                       |

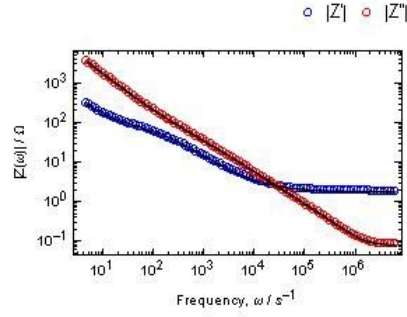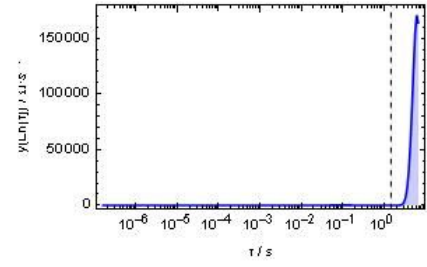

| PWREISPOt-after_wetting_zhit.txt |                          |
|----------------------------------|--------------------------|
| Exp. Time / h                    | -0.37                    |
| Rs / $\Omega$                    | 1.88067                  |
| L / H                            | $1.98603 \times 10^{-8}$ |
| RelError / %                     | 1.01767                  |
| iterations                       | 30000                    |
| Calc. Time [s]                   | 1.2                      |

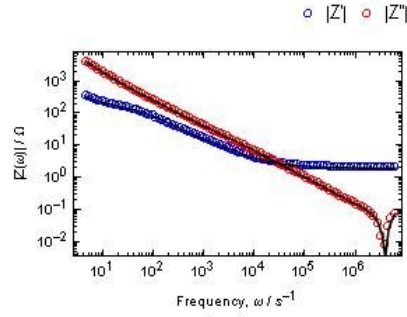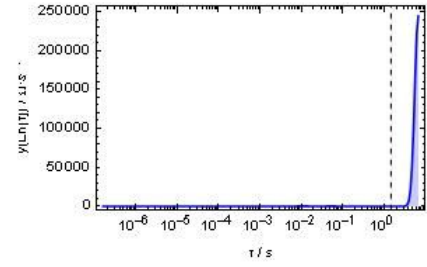

| PWRHYBRIDEIS-lith-2_H1_zhit.txt |                          |
|---------------------------------|--------------------------|
| Exp. Time / h                   | 5.13                     |
| Rs / $\Omega$                   | 1.82318                  |
| L / H                           | $2.36353 \times 10^{-7}$ |
| RelError / %                    | 0.55545                  |
| iterations                      | 30000                    |
| Calc. Time [s]                  | 0.3                      |

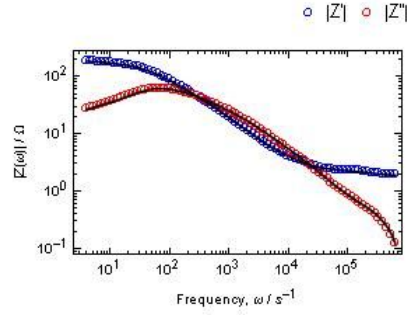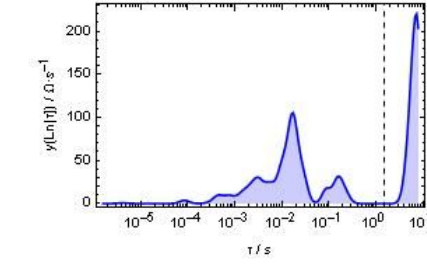

| PWRHYBRIDEIS-delith-1_H1_zhit.txt |                          |
|-----------------------------------|--------------------------|
| Exp. Time / h                     | 8.82                     |
| Rs / $\Omega$                     | 1.91463                  |
| L / H                             | $2.06515 \times 10^{-7}$ |
| RelError / %                      | 0.554728                 |
| iterations                        | 30000                    |
| Calc. Time [s]                    | 0.5                      |

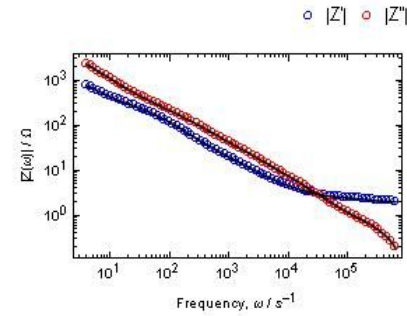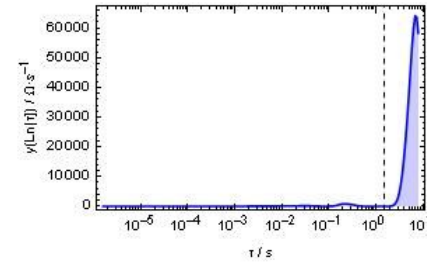

| PWRHYBRIDEIS-lith-2_H2_zhit.txt |                         |
|---------------------------------|-------------------------|
| Exp. Time / h                   | 15.36                   |
| Rs / $\Omega$                   | 1.85751                 |
| L / H                           | $2.4047 \times 10^{-7}$ |
| RelError / %                    | 0.573146                |
| iterations                      | 30000                   |
| Calc. Time [s]                  | 0.5                     |

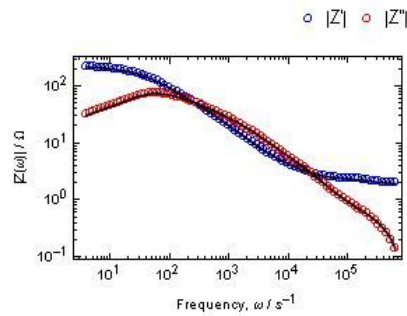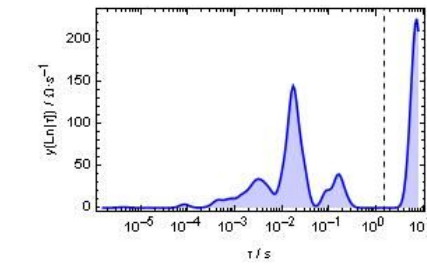

|                                     |                         |
|-------------------------------------|-------------------------|
| PWRHYBRIDEIS-lith-1_#1 (2)_zhit.txt |                         |
| Exp. Time / h                       | 38.83                   |
| Rs / $\Omega$                       | 1.8345                  |
| L / H                               | $2.7348 \times 10^{-7}$ |
| RelError / %                        | 0.609807                |
| iterations                          | 30000                   |
| Calc. Time [s]                      | 0.4                     |

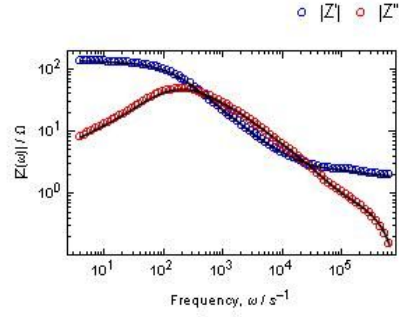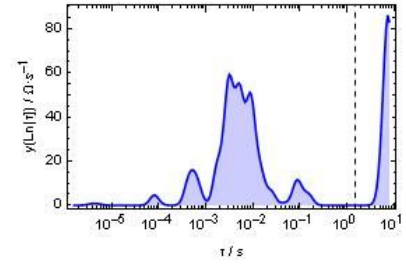

|                                       |                         |
|---------------------------------------|-------------------------|
| PWRHYBRIDEIS-delith-2_#2 (2)_zhit.txt |                         |
| Exp. Time / h                         | 58.17                   |
| Rs / $\Omega$                         | 2.02082                 |
| L / H                                 | $1.2241 \times 10^{-7}$ |
| RelError / %                          | 0.409758                |
| iterations                            | 30000                   |
| Calc. Time [s]                        | 0.4                     |

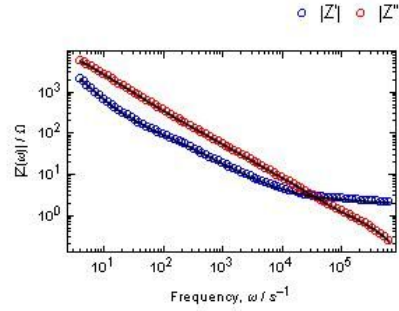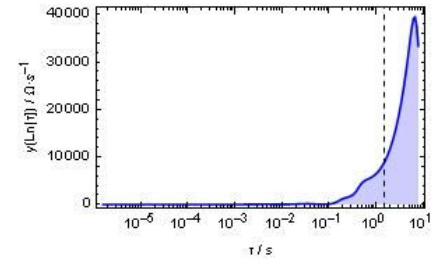

|                                   |                          |
|-----------------------------------|--------------------------|
| PWRHYBRIDEIS-delith-1_#3_zhit.txt |                          |
| Exp. Time / h                     | 69.39                    |
| Rs / $\Omega$                     | 2.02412                  |
| L / H                             | $1.23793 \times 10^{-7}$ |
| RelError / %                      | 0.430002                 |
| iterations                        | 30000                    |
| Calc. Time [s]                    | 0.8                      |

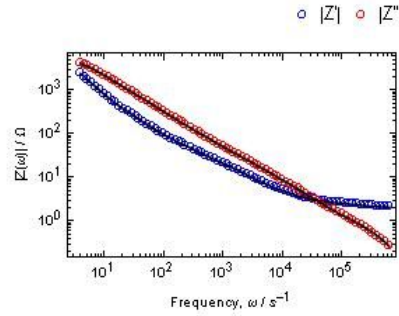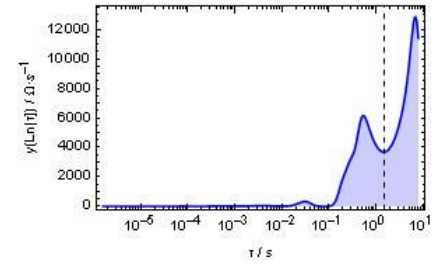

Figure S7: Selection of the EIS analysis results and the corresponding fits.
